# Supplementary material
Source: PubMed Central journal article supplement (PMC2599840)
Supplement: 108.137596_1.pdf [file 108.137596_1.pdf]

# Characterizing aqueous solution conformations of a peptide backbone using Raman optical activity computation

Parag Mukhopadhyay, Gérard Zuber, and David N. Beratan

*Departments of Chemistry and Biochemistry,*

*Duke University*

*5311 French Family Science Center, Durham, North Carolina 27708, U.S.A*

*Fax: (+) 919-660-1605*

*E-mail: gzuber@duke.edu; david.beratan@duke.edu*

## Supporting Information

### *1. Structures of Ala dipeptide-H<sub>2</sub>O clusters*

Figure S1A shows the Ramachandran map for Ala dipeptide structures taken from the MC simulations prior to geometry optimization (see computational methods in the manuscript for detail). Each  $\phi$ ,  $\psi$  pair (black) represents a cluster of H<sub>2</sub>O-Ala dipeptide cluster that have the same peptide backbone dihedral angles with different water geometries. The  $\phi$ ,  $\psi$  values correspond to peptide geometries from low-energy regions 1, 2, and 3 of the Ramchandran map (Figure S1A). The  $\phi$ ,  $\psi$  values for H<sub>2</sub>O-Ala dipeptide structures, and the number of structures for each  $\phi$ ,  $\psi$  pair, appear in Table 1 (360 total structures). Figure S1B shows a wider distribution of  $\phi$ ,  $\psi$  values for the structures of H<sub>2</sub>O-Ala dipeptide clusters, optimized using quantum mechanical energy minimization. The peptide backbone dihedral angles changes upon geometry optimization. However, each peptide conformation, before and after geometry optimization, occupies the same region of the Ramachandran map. Following geometry optimization of the H<sub>2</sub>O-Ala dipeptide cluster, the structures were used for computing ROA and Raman spectra using time-dependent DFT.

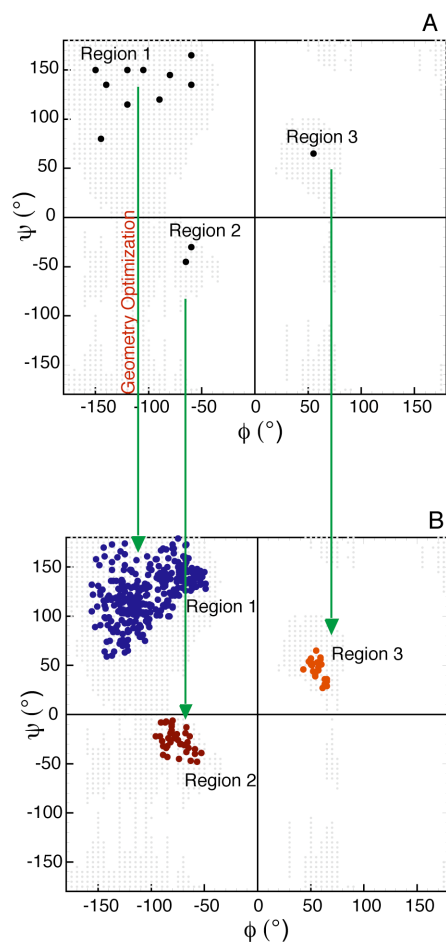

Figure S1. Ramachandran map of  $\phi, \psi$  pairs for Ala dipeptide-water cluster structures taken from the Monte Carlo simulations. Figure S1A shows a collection of Ala dipeptide-water cluster structures (black) that have the same peptide backbone conformation with different water arrangements. Figure S1B shows the distribution of  $\phi, \psi$  values for the alanine dipeptide-water clusters optimized using quantum mechanical energy minimization. Green arrows show that each peptide conformation, before and after energy minimization, occupies the same region on the Ramachandran map.

**Table 1.** The peptide backbone dihedral angles ( $\phi$ ,  $\psi$ ) of alanine dipeptide-water cluster structures from the Monte Carlo simulations used in the quantum mechanical energy minimization.

| $\phi$ , $\psi$<br>values<br>(deg) | Number of structures<br>with explicit water |
|------------------------------------|---------------------------------------------|
| -150, 150                          | 30                                          |
| -140, 135                          | 30                                          |
| -120, 115                          | 30                                          |
| -90, 120                           | 30                                          |
| -120, 150                          | 30                                          |
| -105, 150                          | 30                                          |
| -80, 145                           | 30                                          |
| -60, 165                           | 30                                          |
| -60, 135                           | 30                                          |
| -145, 80                           | 30                                          |
| -65, -45                           | 20                                          |
| -60, -30                           | 10                                          |
| 55, 65                             | 30                                          |

## 2. Dependence of computed ROA spectra on the $\phi$ , $\psi$ dihedral angles of Ala dipeptide- $H_2O$ clusters

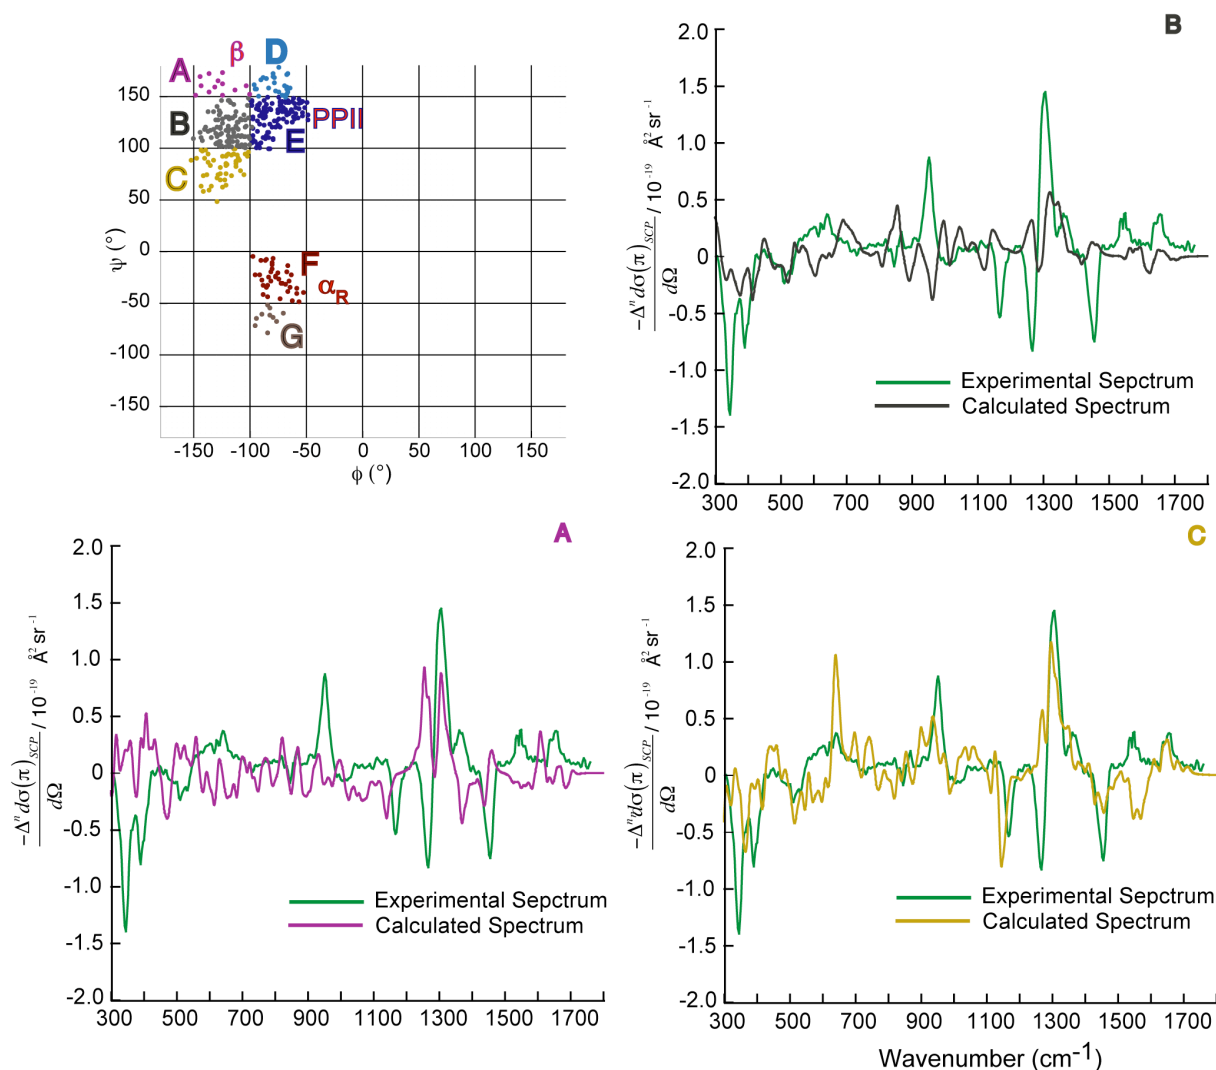

Figure S2. ROA spectra computed using Ala dipeptide- $H_2O$  cluster from the low-energy region of the Ramachandran map. The computed spectra shown are averaged over a collection of dipeptide conformations from regions A, B and C of the Ramchandan map (inset in A). The experimental spectrum (in arbitrary units) is from reference [14].

Figures S2 and S3 show the computed ROA spectra for Ala dipeptide-water cluster from the low-energy regions of the Ramchandan map. For example, Figures S2A, S3E and S3F show the computed ROA spectra using sets of Ala dipeptide conformations from the  $\beta$ , PPII and  $\alpha_R$  conformational region of the Ramchandan map (insets in Figures S2 A, E and F), respectively. The computed spectra are averaged over sets of Ala dipeptide conformations on  $50^{\circ} \times 50^{\circ}$  grids of  $\phi$  and  $\psi$ .

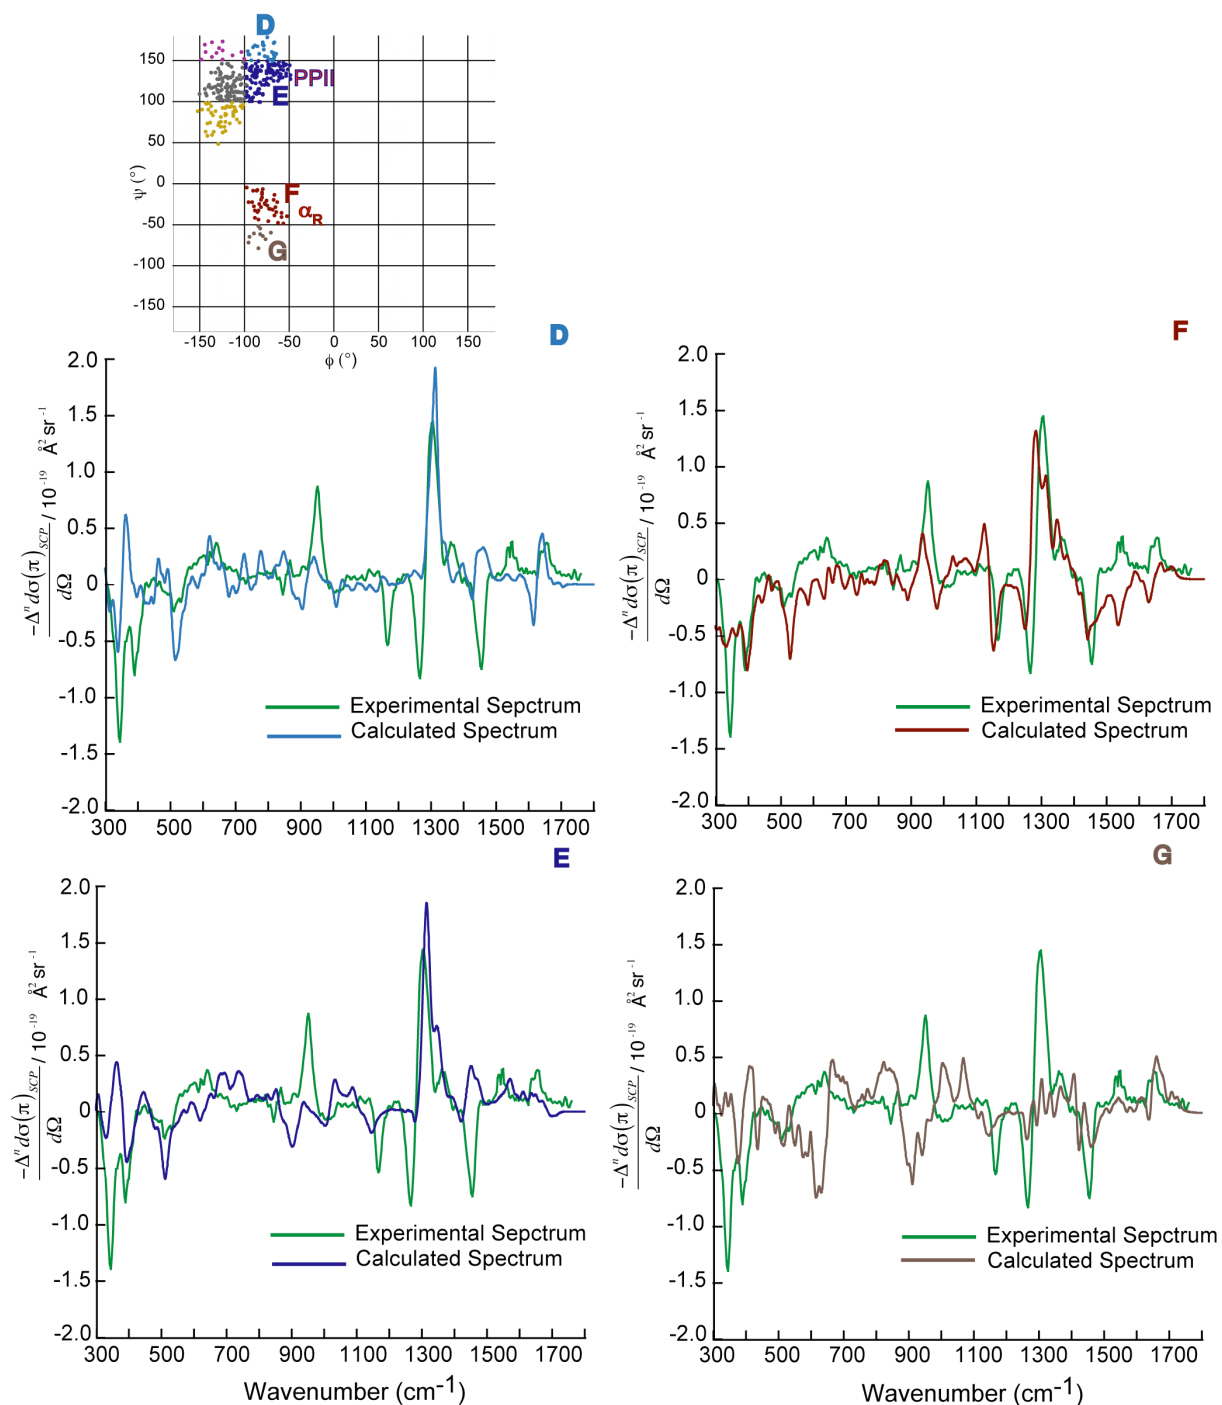

Figure S3. ROA spectra computed using Ala dipeptide- $\text{H}_2\text{O}$  cluster from the low-energy region of the Ramachandran map. The computed spectra shown are averaged over a collection of dipeptide conformations from regions D, E, F and G of the Ramchandran map (inset in A). The experimental spectrum (in arbitrary units) is from reference [14].

The ROA spectral features in the computed spectra using PPII (Figure S3E),  $\alpha_R$  (Figure S3F) and  $\beta$  (Figure S2A) conformations of Ala dipeptide in aqueous solution are very different. Thus, different ROA spectrum originates from very different peptide conformations, and hence a conformational preference of a peptide is obtained by correlating simulated and measured ROA spectra of the peptide in aqueous solution.

### 3. Dependence of computed ROA spectra on the $\phi, \psi$ dihedral angles of Ala dipeptide- $D_2O$ clusters

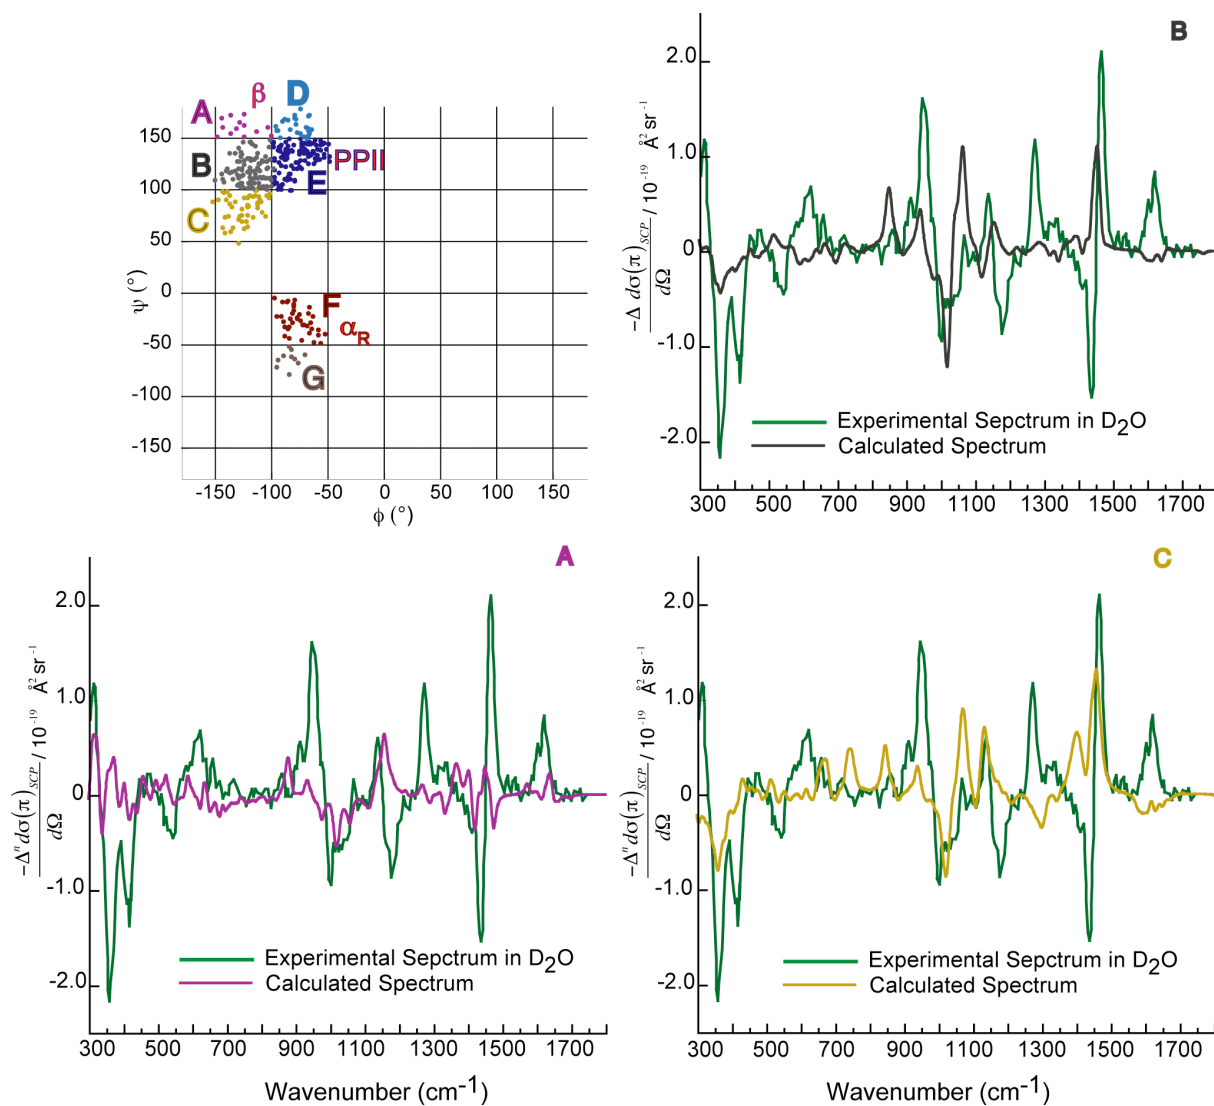

Figure S4. ROA spectra computed using Ala dipeptide- $D_2O$  cluster from the low-energy region of the Ramachandran map. The computed spectra shown are averaged over a collection of dipeptide conformations from regions A, B and C of the Ramachandran map (inset in A). The experimental spectrum (in arbitrary units) is from reference [14].

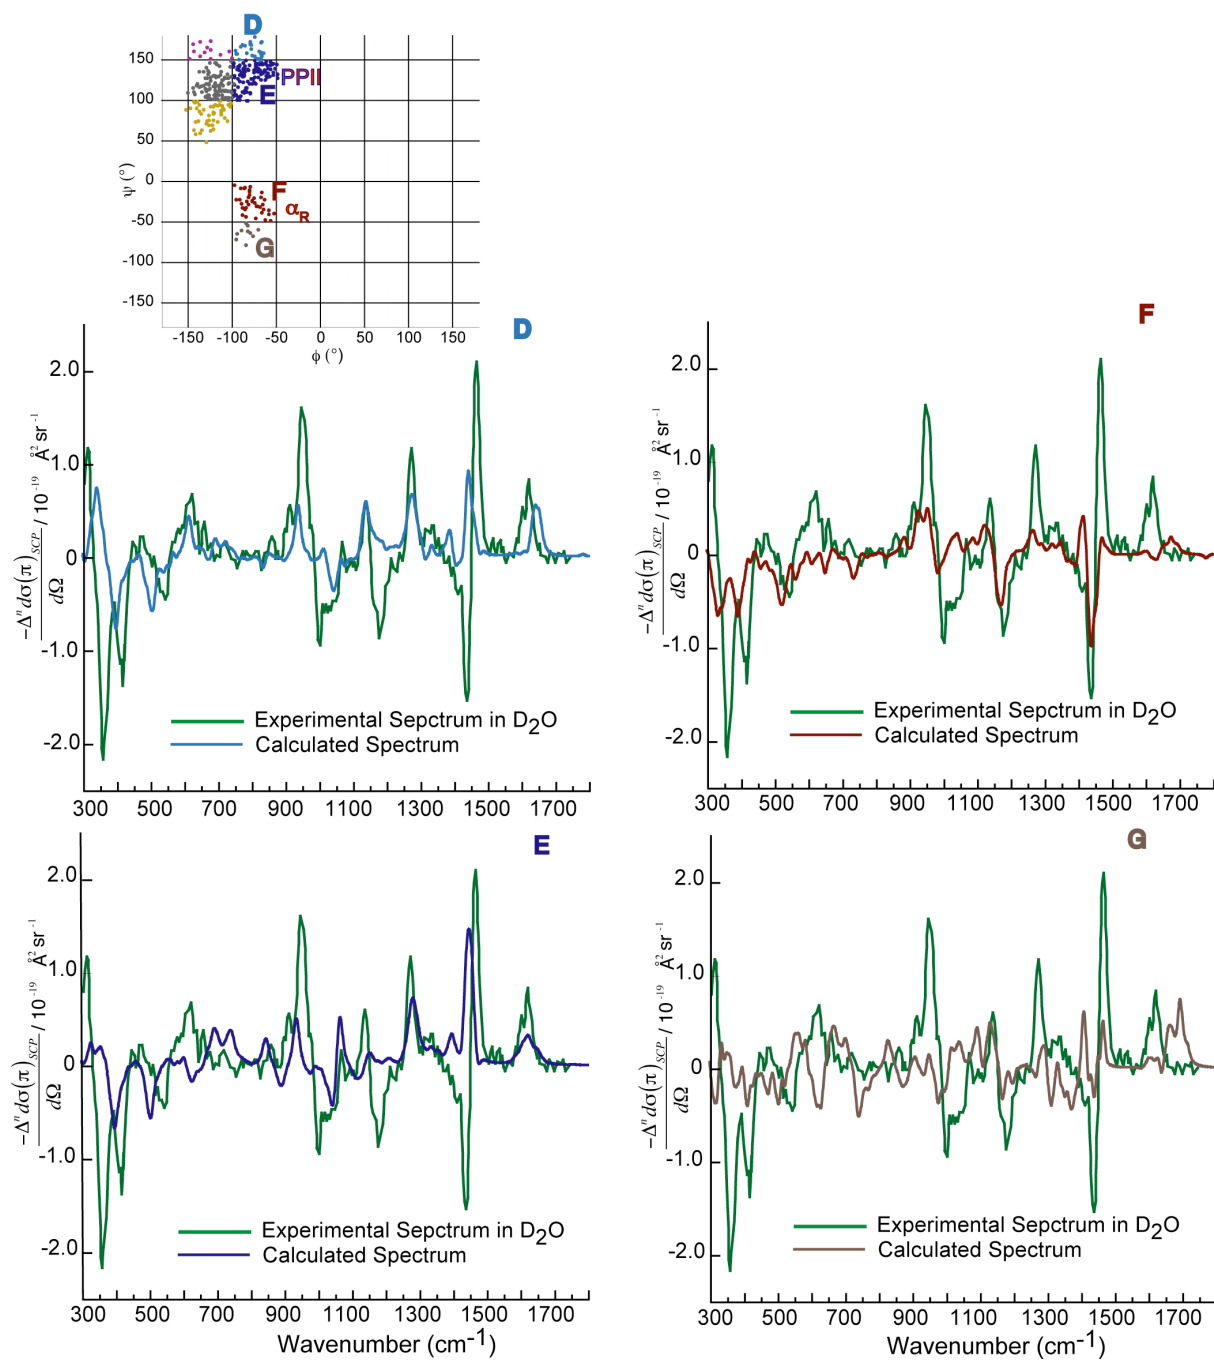

Figure S5. ROA spectra computed using Ala dipeptide-D<sub>2</sub>O cluster from the low-energy region of the Ramachandran map. The computed spectra shown are averaged over a collection of dipeptide conformations from regions D, E, F and G of the Ramchandran map (inset in A). The experimental spectrum (in arbitrary units) is from reference [14].

Figures S4 and S5 both show the dependence of the computed ROA spectra on the  $\phi$  and  $\psi$  angles of Ala dipeptide in D<sub>2</sub>O. For example, the ROA spectral features in the computed spectra using PPII (Figure S5E),  $\alpha_R$  (Figure S5F) and  $\beta$  (Figure S4A) conformations of Ala dipeptide in aqueous solution are very different. Thus, similar to the H<sub>2</sub>O results, different ROA spectrum originates from very different peptide conformations, and hence a conformational preference of a peptide is obtained by correlating simulated and measured ROA spectra of the peptide in aqueous solution.

4. ROA spectra of the H<sub>2</sub>O- and D<sub>2</sub>O-Ala dipeptide clusters from the  $\alpha_L$  and  $\beta$  regions of the Ramachandran map.

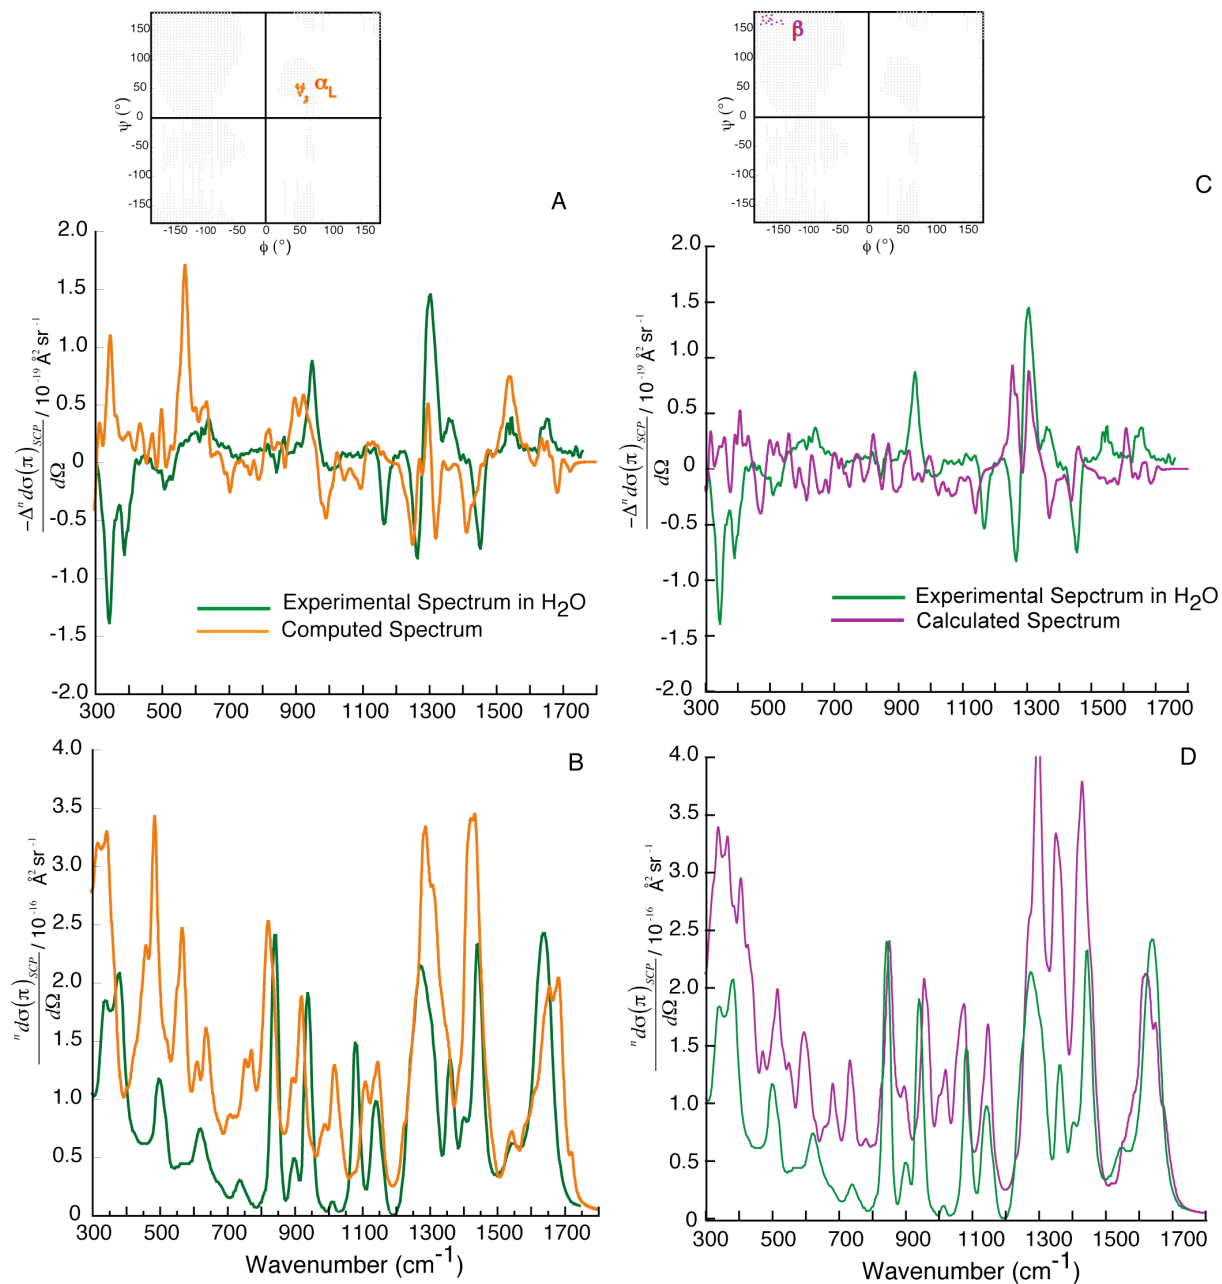

Figure S6. SCP backscattering ROA (A, C) and Raman (B, D) spectra of Ala dipeptide in H<sub>2</sub>O. The computed spectra shown in orange and pink are averaged over a collection of dipeptide conformations from  $\alpha_L$  (inset in A) and  $\beta$  (inset in C) regions of the Ramachandran map. The experimental spectrum (in arbitrary units) is from reference [14].



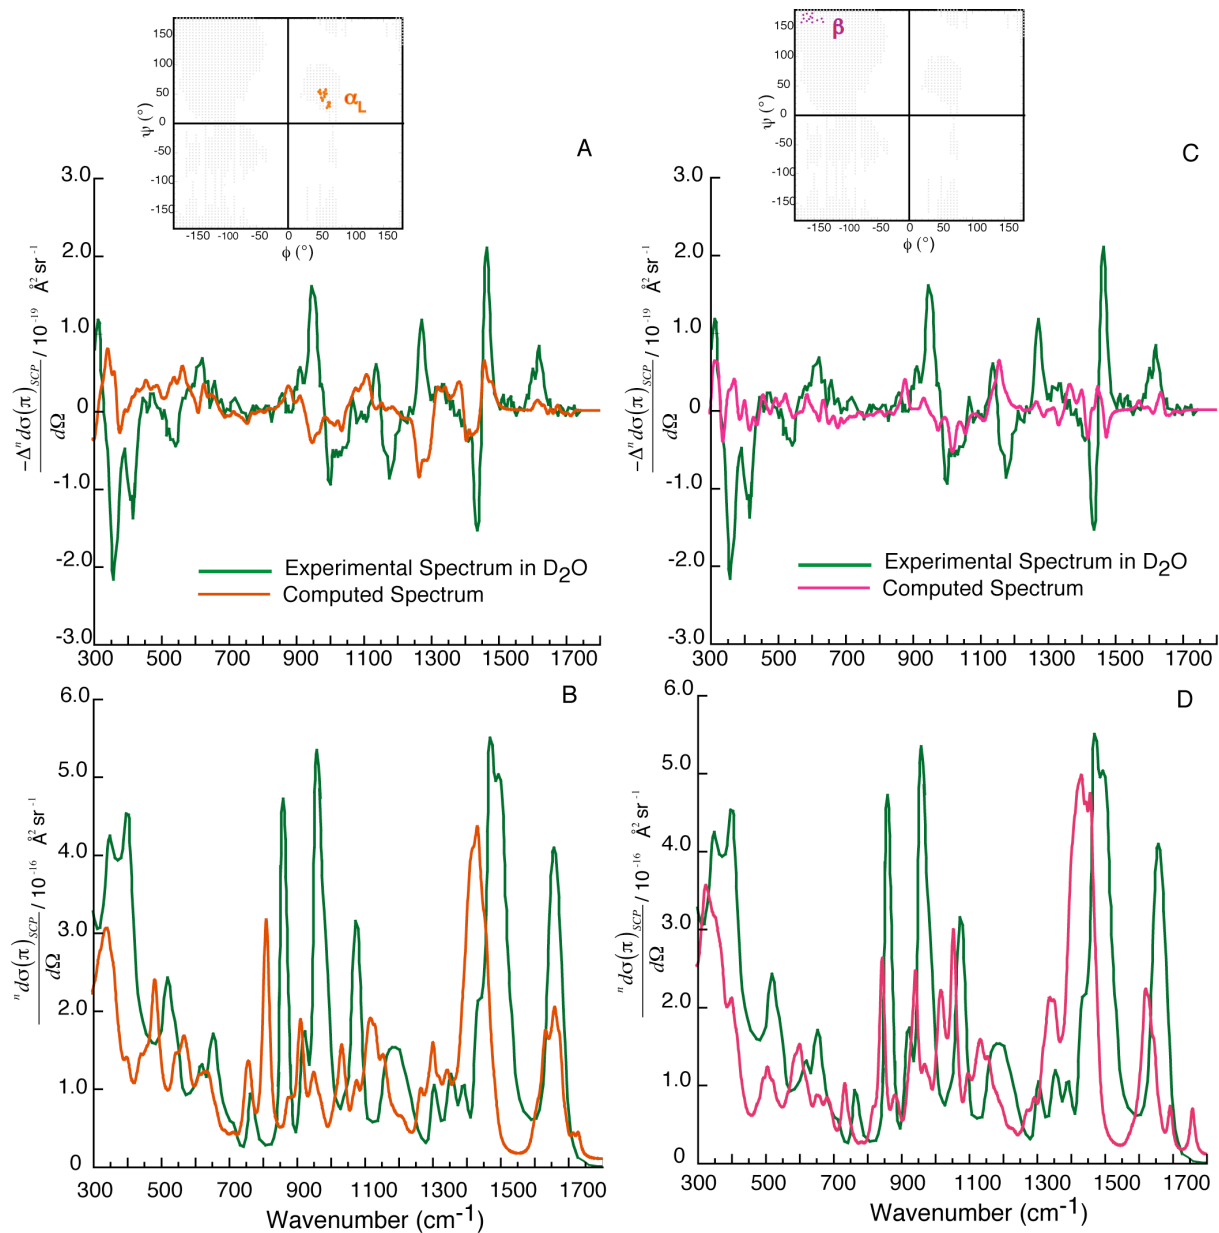

Figure S7. SCP backscattering ROA (A, C) and Raman (B, D) spectra of Ala dipeptide in D<sub>2</sub>O. The computed spectra shown in orange and pink are averaged over a collection of dipeptide conformations from  $\alpha_L$  (inset in A) and  $\beta$  (inset in C) regions of the Ramchandran map. The experimental spectrum (in arbitrary units) is from reference [14].

Figures S6 and S7 show that there is no significant correlation between the measured and computed ROA and Raman spectra using the  $\alpha_L$  (with  $45^\circ \leq \phi \leq 65^\circ$  and  $25^\circ \leq \psi \leq 55^\circ$ ) and  $\beta$  (with  $-180^\circ \leq \phi \leq -125^\circ$  and  $150^\circ \leq \psi \leq 180^\circ$ ) conformations of H<sub>2</sub>O-Ala dipeptide and D<sub>2</sub>O-Ala dipeptide clusters. Thus, our ROA analysis suggests that Ala dipeptide in water populates  $\alpha_R$  and PPII conformations but no substantial population of  $\alpha_L$  and  $\beta$  structures.

5. Group coupling matrices for the Raman intensities associated with the vibrations in the low wavenumber for a PPII  $\alpha_R$  of Ala dipeptide.

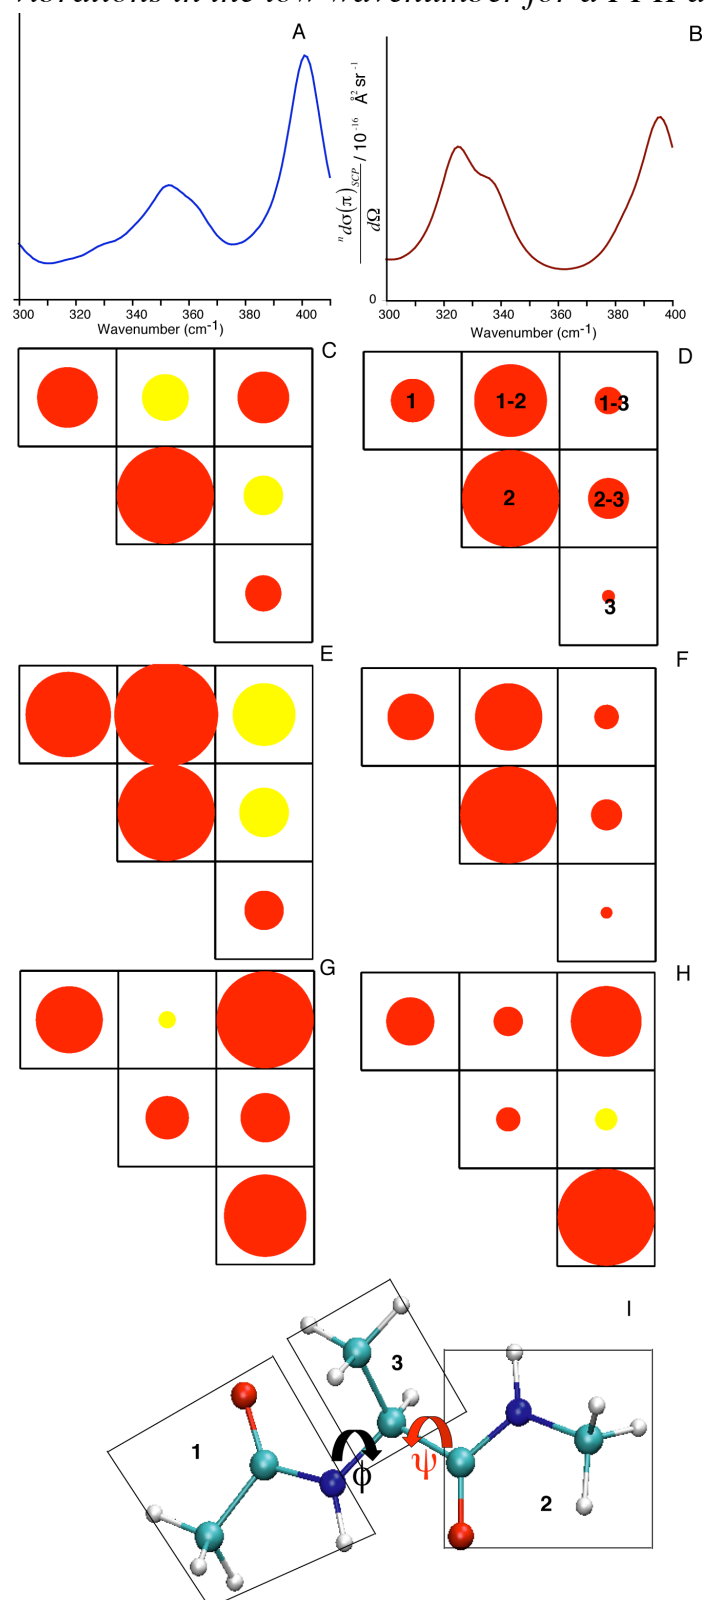

Figure S8. Raman intensity differences associated with the vibrations in the low wavenumber range decomposed into contributions from groups of atoms in Ala dipeptide for a PPII ( $\phi = -68^\circ$  and  $\psi = 135^\circ$ ; A) and a  $\alpha_R$  ( $\phi = -73^\circ$  and  $\psi = -30^\circ$ ; B) conformation. Positive and negative Raman intensity differences are shown as red and yellow circles. The groups of atoms corresponding to the matrix elements are shown in I.

Figures S8 C and G shows the Raman intensities associated with the vibrations at  $\sim 364\text{ cm}^{-1}$  (C) and at  $\sim 401\text{ cm}^{-1}$  (G) for a PPII conformation of Ala dipeptide. Similarly, Figures S8 D and H shows the group coupling matrices for the Raman intensities associated with the vibrations at  $\sim 325\text{ cm}^{-1}$  (D) and at  $\sim 395\text{ cm}^{-1}$  (H) for a  $\alpha_R$  ( $\phi = -73^\circ$  and  $\psi = -30^\circ$ ) conformation of Ala dipeptide. Figures S8 E and F show the ROA intensity differences associated with molecular vibrations at  $\sim 352\text{ cm}^{-1}$  for the PPII and at  $\sim 338\text{ cm}^{-1}$  for the  $\alpha_R$  conformation.

## References

- (1) Jorgensen, W. L.; Tirado-Rives, J. *J. Comput. Chem.* **2005**, *26*, 1689.
- (2) Allen, M. P.; Tildesley, D. J. In *Computer simulations of liquids*; Oxford University Press: Oxford, 1987.
- (3) Jorgensen, W. L.; Maxwell, D. S.; TiradoRives, J. *J. Am. Chem. Soc.* **1996**, *118*, 11225.
- (4) Jorgensen, W. L.; Chandrasekhar, J.; Madura, J. D.; Impey, R. W.; Klein, M. *J. Chem. Phys.* **1983**, *79*, 926.
- (5) Dewar, M. J. S.; Zoebisch, E. G.; Healy, E. F.; Stewart, J. J. P. *J. Am. Chem. Soc.* **1985**, *107*, 3902.
- (6) Storer, J. W.; Giesen, D. J.; Cramer, C. J.; Truhlar, D. G. *J. Comput-Aided Mol. Des.* **1995**, *9*, 87.
- (7) (a) Zuber, G.; Goldsmith, M. R.; Beratan, D. N.; Wipf, P. *Chemphyschem* **2005**, *6*, 595. (b) Lubber, S.; Herrmann, C.; Reiher, M. *J. Phys. Chem. B* **2008**, *112*, 2218.
- (8) Barron, L. D.; Buckingham, A. D. *Mol. Phys.* **1971**, *20*, 1111.
- (9) Barron, L. D.; Escribano, J. R. *Chem, Phys.* **1985**, *98*, 437.
- (10) Hug, W. *Chem. Phys. Lett.* **2001**, *264*, 53.
- (11) Ahlrichs, R.; Bär, M.; Baron, H.-P.; Bauernschmitt, R.; Böcker, S.; Ehrig, M.; Eichkorn, K.; Elliott, S.; Furche, F.; Haase, F. e. a. *Turbomole 5.6*, 2002.
- (12) Eichkorn, K.; Weigend, F.; Treutler, O.; Ahlrichs, R. *Theor. Chem. Acc.* **1997**, *97*, 119.
- (13) Grimme, S.; Furche, F.; Ahlrichs, R. *Chem. Phys. Lett.* **2002**, *361*, 321.
- (14) Deng, Z.; Polavarapu, P. L.; Ford, S. J.; Hecht, L.; Barron, L. D.; Ewig C. S.; Jalkanen, K. *J. Phys. Chem.* **1996**, *100*, 2025.
